# Supplementary material for: Evaluation of a Medical Grade Thermoplastic Polyurethane for the Manufacture of an Implantable Medical Device: The Impact of FDM 3D-Printing and Gamma Sterilization
Source: MDPI journal article supplement (doi:10.3390/pharmaceutics15020456), 2023-01-30
Supplement: s1 [file s1]

Supplementary Materials:

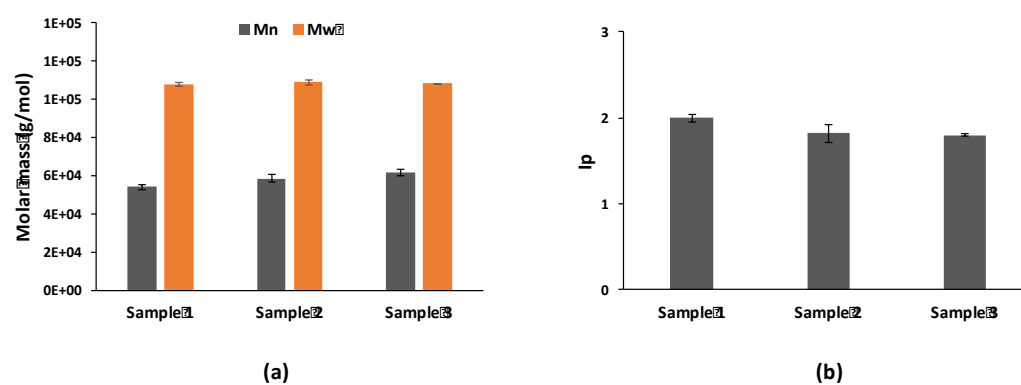

**Figure S1.** Reproducibility of FDM processing: Molar mass (a) and Polydispersity Index  $I_p$  (b) of samples after one, two and three successive prints ( $n = 2$ ).
